# Supplementary material
Source: PubMed Central journal article supplement (PMC2769037)

**Supplemental Table.** Oligonucleotides used in this study for creation of miRNA and luciferase reporter plasmids, mutagenesis and qPCR analyses.

| Plasmid or Application                                  | Oligonucleotide | Sequence (5'→3')                          |
|---------------------------------------------------------|-----------------|-------------------------------------------|
| <b>Plasmid</b>                                          |                 |                                           |
| pS-miR-27b                                              | Forward         | CGGGATCCCGGATTTATGCCAGCGATGACCTCTCTAACAA  |
|                                                         | Reverse         | CCCAAGCTTGGGTAACTGTCCCCATCTCACCTTCTCTTCA  |
| pS-mmu-miR-298                                          | Forward         | CGGGATCCCGATTTCCAGGCCTTTGGCAGAGGAGGGCTGTT |
|                                                         | Reverse         | CCCAAGCTTGGGATTGCCACTCCTAAGCTGAGAGAAGG    |
| pS-miR-122a                                             | Forward         | CGCGGATCCCAGCGTTTGAACCACTGAGGAGTC         |
|                                                         | Reverse         | CCCAAGCTTACACACAATGGAGAACTCTAGCACA        |
| pGL3-CYP3A4-3'UTR (0-1130 bp) luciferase reporter       | Forward         | AGCTCTAGAGCATTTCCTAAGGACTTCTGCTTTGCTC     |
|                                                         | Reverse         | ATAGGCCCGCCAAGTGTTTCATTGCATCGAGACAGTTGG   |
| psiCHECKII-VDR-3'UTR (-59-1360 bp) luciferase reporter  | Forward         | CCGCTCGAGCGGAGTGCAGCATGAAGCTAACGCCCTTGT   |
|                                                         | Reverse         | TTGCGGCCGCAAAAGCCTCTGTGATCCACCTCGAAGAACG  |
| psiCHECKII-VDR-3'UTR (1255-2263 bp) luciferase reporter | Forward         | CCGCTCGAGCGGGAAGCGTCTGTCCGTTTACTCCAAGGTG  |
|                                                         | Reverse         | TTGCGGCCGCAACGGAGTTTCGCTCTTGTGTCCAGGTT    |
| <b>qPCR</b>                                             |                 |                                           |
| CYP3A4 CDS                                              | Forward         | GCCTGGTGCTCCTCTATCTA (exon 1)             |
|                                                         | Reverse         | GGCTGTTGACCATCATAAAAAG (exon 4)           |
| CYP3A4 miR-298/27b-MRE 3'UTR                            | Forward         | GCTTCATCCAATGGACTGCATAAATAAC              |
|                                                         | Reverse         | TCTTTCTAAACAATGGGCAAAGTCACAG              |
| VDR CDS                                                 | Forward         | GACATCGGCATGATGAAGGA                      |
|                                                         | Reverse         | CTAGGGTCACAGAAGGGTCATC                    |
| CYP3A4 miR-298-MRE 3'UTR                                | Forward         | CAGCCACCTGCTCTATGC                        |
|                                                         | Reverse         | CCACTTGGGTTTCTTTGTC                       |
| CYP3A4 miR-27b-MRE 3'UTR                                | Forward         | AAACATCTGAAAGCCACG                        |
|                                                         | Reverse         | TCTCCCACTGAAGAGCAA                        |
| GAPDH                                                   | Forward         | ATCACCATCTTCCAGGAGCGA                     |
|                                                         | Reverse         | GCTTCACCACCTTCTTGATGT                     |
| <b>Mutagenesis</b>                                      |                 |                                           |
| CYP3A4 3'UTR miR-27b-MRE Mutant 1                       | Forward         | AGGTGAAAGTTAATCCTCGGTCACTT TGCCCATG       |

|                                  |                   |                                                |
|----------------------------------|-------------------|------------------------------------------------|
| Mutant 2                         | Reverse           | CAATGGGCAAAGTGACCGAGGATTAACCTTTCACCT           |
|                                  | Forward           | AGGTGAAAGTTAATCCTCGGTGACTTTGCCCATTTG           |
|                                  | Reverse           | CAATGGGCAAAGTCACCGAGGATTAACCTTTCACCT           |
| CYP3A4 3'UTR miR-298-MRE         |                   |                                                |
| Mutant 1                         | Forward           | GGAGGTAGATTTGGCTGGTCTCCTTCTCACGGG              |
|                                  | Reverse           | CCCGTGAGAAGGAGACCAGCCAAATCTACCTCC              |
| Mutant 2                         | Forward           | GGAGGTAGATTTGGCTGGTCTGCTTCTCACGGG              |
|                                  | Reverse           | CCCGTGAGAAGCAGACCAGCCAAATCTACCTCC              |
| <b>Stem-loop RT qPCR</b>         |                   |                                                |
| miRNA RT                         | Universal reverse | TGTCAGGCAACCGTATTCACCGTGAGTGG(T) <sub>18</sub> |
| qPCR of mmu-miR-298              | Forward           | GGCAGAGGAGGGCTGTTCTTCCC                        |
|                                  | (specific)        |                                                |
| qPCR of miR-27b                  | Forward           | TTCACAGTGGCTAAGTTCTGC                          |
|                                  | (specific)        |                                                |
| Universal specific REV<br>U6 RNA | Reverse primer    | TGTCAGGCAACCGTATTCACC                          |
|                                  | Forward           | CTCGCTTCGGCAGCACA                              |
|                                  | Reverse           | AACGCTTCACGAATTTGCGT                           |

**Supplemental Figure 1.** Lin-41 luciferase reporter activity was reduced about 50% in HEK293 cells co-transfected with pS-Let-7a plasmid, as compared to cells co-transfected with pS-Neg plasmid. Values represent mean  $\pm$  SD of triplicate transfections.

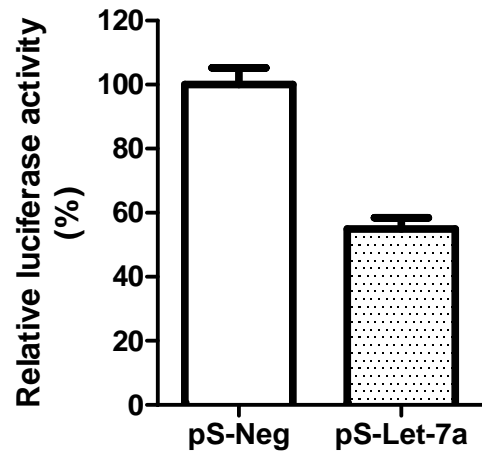

**Supplemental Figure 2.** Semi-quantitation of CYP3A4 protein in PANC1 and LS-180 cells based on densitometric analyses of immunoblot bands. GAPDH was used as a loading control. Values in individual groups represent mean of randomly-selected two samples from triplicate transfections.

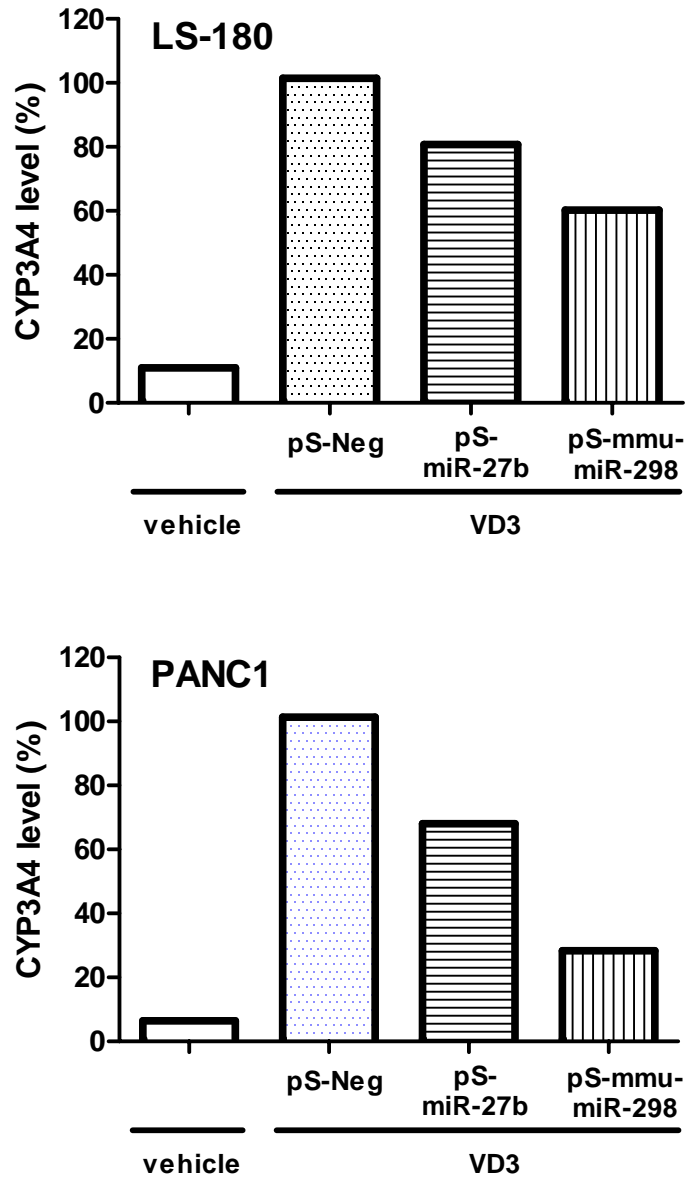

**Supplemental Figure 3.** Semi-quantitation of VDR protein based on densitometric analyses of immunoblot bands. GAPDH was used as a loading control. Values in individual groups represent mean of randomly-selected two samples from triplicate transfections.

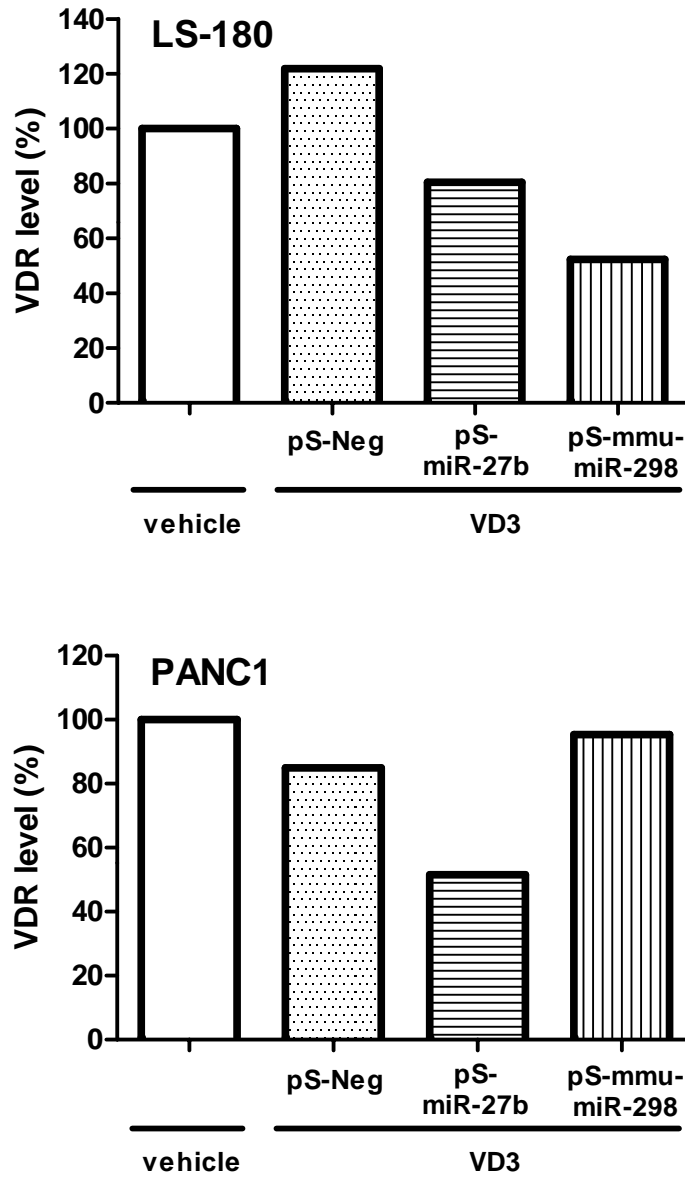

Supplement: 109.027680_1.pdf [file 109.027680_1.pdf]
